# Supplementary material for: Spatial multiomics of human hepatic lymph nodes reveals early APC bifurcation in liver transplant rejection
Source: Research Square preprint supplement (doi:10.21203/rs.3.rs-7901096/v1), 2025-10-28
Supplement: Supplementary file 1 [file 4673e19f910bdd7c3257ee48.xlsx]

## Sheet: Supplementary Tables
Supplementary Materials Tables
Supplementary Table 1. OLT cohort with pre- and post-reperfusion HDLN
	Case	Primary Diagnosis	HDLN Pre	HDLN Post	Outcome	Donor/Recipient Gender	Time from liver allograft reperfusion to post-reperfusion HDLN removal, min
	1	PBC/ESRD	Slide #1 A7	Slide #1 B3	Rejection	male/female	46
	2	NASH	Slide #2 C1	Slide #2 E1	Non-rejection	female/female	43
	3	ALD/PAN/ESRD	Slide #3 E1	Slide #3 G1	Rejection	female/male	51
	4	ALD/CKD Stage V	Slide #4 C1	Slide #4 E1	Rejection	female/male	32
	5	CRYPTO	Slide #5 C1	Slide #5 D1	Non-rejection	female/male	50
	6	PSC	Slide #6 A1	Slide #6 C1	Non-rejection	male/male	76
	7	NAFLD	Slide #7 C1	Slide #8 D2	Rejection	male/male	55
	8	ALF	Slide #7 D1	Slide #8 E1	Non-rejection	female/male	45
	9	ALD/HCC	Slide #7 E1	Slide #7 E1	Excluded	male/male	48
Supplementary Table 2. MxIF panel information
	Channel Index	Marker Name	AKYP Code	BX #	Fluorophore / Notes
	1	DAPI			Nuclear stain (ancillary)
	2	CD44	AKYP0073	BX005	Atto 550
	3	HLA-DR	AKYP0063	BX033	Alexa Fluor 750
	4	CD4	AKYP0048	BX003	Alexa Fluor 647
	5	IFNG	AKYP0093	BX020	Atto 550
	6	Ki67	AKYP0052	BX047	Alexa Fluor 750
	7	CD107a	AKYP0004	BX006	Alexa Fluor 647
	8	CD45	AKYP0074	BX021	Atto 550
	9	CD20	AKYP0049	BX064	Alexa Fluor 750
	10	CD40	AKYP0095	BX010	Alexa Fluor 647
	11	CD8	AKYP0028	BX026	Atto 550
	12	Pan-Cytokeratin	AKYP0053	BX066	Alexa Fluor 750
	13	CD68	AKYP0050	BX015	Alexa Fluor 647
	14	HLA-A	AKYP0078	BX029	Atto 550
	15	CD79a	AKYP0109	BX090	Alexa Fluor 750
	16	CD45RO	AKYP0059	BX017	Alexa Fluor 647
	17	CD21	AKYP0061	BX032	Atto 550
	18	CD11c	AKYP0051	BX024	Alexa Fluor 647
	19	HLA-E	AKYP0096	BX034	Atto 550
	20	IDO1	AKYP0084	BX027	Alexa Fluor 647
	21	CD14	AKYP0079	BX037	Atto 550
	22	CD56	AKYP0118	BX028	Alexa Fluor 647
	23	VISTA	AKYP0094	BX040	Atto 550
	24	FOXP3	AKYP0102	BX031	Alexa Fluor 647
	25	Granzyme_B	AKYP0086	BX041	Atto 550
	26	PCNA	AKYP0085	BX036	Alexa Fluor 647
	27	T-bet/TBX21	AKYP0117	BX052	Atto 550
	28	PD-L1	AKYP0103	BX043	Alexa Fluor 647
	29	TOX	AKYP0098	BX060	Atto 550
	30	PD-1	AKYP0070	BX046	Alexa Fluor 647
	31	CD38	AKYP0110	BX089	Atto 550
	32	ICOS	AKYP0090	BX054	Alexa Fluor 647
	33	CD39	AKYP0107	BX099	Atto 550
	34	LAG3	AKYP0089	BX055	Alexa Fluor 647
	35	TCF-1	AKYP0099	BX061	Alexa Fluor 647
	36	CD3e	AKYP0062	BX080	Alexa Fluor 647
Supplementary Table 3. Hypothesis-driven ORA gene sets
	Index	CellType	GeneSet	GeneCount	Genes	N	K	n	k	odds_ratio	pval	HitsCount	Hits
	19	CD3	TCR_Immediate_Early	32	FOS;FOSB;JUN;JUNB;JUND;EGR1;EGR2;EGR3;NR4A1;NR4A2;NR4A3;DUSP1;DUSP2;DUSP5;DUSP10;IER2;IER3;ZFP36;ZFP36L1;ZFP36L2;KLF2;KLF4;KLF6;KLF10;RCAN1;BTG1;BTG2;NFKBIA;NFKBIZ;REL;CD69;PPP1R15A	13040	31	6359	28	9.84489	1e-06	28	BTG2;DUSP1;DUSP2;DUSP5;EGR1;EGR2;EGR3;FOS;FOSB;IER2;IER3;JUN;JUNB;JUND;KLF2;KLF4;NR4A1;NR4A2;NR4A3;NFKBIA;NFKBIZ;PPP1R15A;RCAN1;REL;ZFP36;ZFP36L1;ZFP36L2;CD69
	23	CD3	IL27_STAT1_STAT3_Response	11	IL27RA;IL6ST;STAT1;STAT3;JAK1;TYK2;SOCS1;SOCS3;IRF1;BATF;PRDM1	13040	11	6359	10	10.5213	0.004643	10	BATF;IL27RA;IRF1;JAK1;PRDM1;SOCS1;SOCS3;STAT1;STAT3;IL6ST
	21	CD3	AP1_NFkB_Crosstalk	27	REL;RELA;RELB;NFKB1;NFKB2;NFKBIA;TNFAIP3;BCL3;IKBKB;CHUK;IKBKG;MAP3K7;TAB1;TAB2;TRAF2;TRAF6;MAPK1;MAPK3;MAPK8;MAPK9;MAPK10;MAPK14;FOS;FOSB;JUN;JUNB;JUND	13040	26	6359	19	2.85728	0.010399	19	BCL3;CHUK;FOS;IKBKB;IKBKG;JUN;JUNB;JUND;MAPK1;MAPK14;NFKB1;NFKB2;NFKBIA;RELA;RELB;REL;TAB1;TAB2;TRAF6
	22	CD3	IL6_STAT3_Response	15	IL6;IL6R;IL6ST;JAK1;JAK2;TYK2;STAT3;SOCS3;SOCS1;CISH;PIM1;PIM2;BATF;BCL3;BCL2A1	13040	14	6359	11	3.85728	0.023094	11	BATF;BCL3;CISH;IL6;IL6R;JAK1;PIM1;SOCS1;SOCS3;STAT3;IL6ST
	30	CD3	Checkpoint_Ligands_PD1_Axis	12	CD274;PDCD1LG2;CD80;CD86;VSIR;VTCN1;CD276;LGALS9;PVR;NECTIN2;TNFRSF14;ICOSLG	13040	10	6359	8	4.20658	0.046466	8	CD274;CD80;ICOSLG;NECTIN2;PDCD1LG2;PVR;TNFRSF14;VSIR
	32	CD3	IL13_IL4_STAT6_Signaling	10	IL13;IL4;IL4R;IL13RA1;STAT6;IRS2;SOCS1;CISH;KLF4;MAF	13040	10	6359	8	4.20658	0.046466	8	CISH;IL13RA1;IL4R;IRS2;KLF4;MAF;SOCS1;STAT6
	35	CD3	Mevalonate_Cholesterol_Biosynthesis	14	HMGCS1;HMGCR;MVK;PMVK;MVD;FDPS;IDI1;IDI2;FDFT1;SQLE;LSS;SC5D;DHCR24;DHCR7	13040	12	6359	9	3.15496	0.061695	9	DHCR24;DHCR7;FDPS;HMGCR;HMGCS1;IDI1;MVD;PMVK;SQLE
	33	CD3	AP1_Activation_Module	15	JUN;JUNB;JUND;FOS;FOSB;ATF3;MAPK1;MAPK3;MAPK8;MAPK9;MAPK14;DUSP1;DUSP2;DUSP5;DUSP10	13040	14	6359	10	2.62915	0.075499	10	ATF3;DUSP1;DUSP2;DUSP5;FOS;JUN;JUNB;JUND;MAPK1;MAPK14
	20	CD3	Calcineurin_NFAT_Activation	18	PPP3CA;PPP3CB;PPP3R1;PPP3R2;CABIN1;RCAN1;CALM1;CALM2;CALM3;NFATC1;NFATC2;NFATC3;NFATC4;IL2;TNF;CD40LG;EGR1;EGR2	13040	18	6359	12	2.10336	0.09908	12	CALM1;CALM3;CD40LG;EGR1;EGR2;IL2;NFATC1;PPP3CA;PPP3R1;RCAN1;PPP3CB;PPP3R2
	31	CD3	IDO1_Tryptophan_Kynurenine_AhR	13	IDO1;IDO2;TDO2;KMO;KYNU;AFMID;AHR;ARNT;AHRR;IL10;TGFB1;IL10RA;IL10RB	13040	12	6359	8	2.10266	0.17075	8	AFMID;AHR;ARNT;IDO1;IDO2;IL10;KYNU;TDO2
	27	CD3	Stress_Immediate_Response	17	HSP90AA1;HSP90AB1;HSPA1A;HSPA1B;HSPA8;HSPH1;HSPB1;DNAJB1;DNAJB4;DNAJA1;DNAJA4;ATF3;FOS;FOSB;JUN;JUNB;EGR1	13040	16	6359	10	1.75224	0.198064	10	ATF3;DNAJB1;EGR1;FOS;HSP90AB1;HSPA1B;HSPA8;HSPB1;HSPH1;JUN
	29	CD3	Trafficking_Activation	9	CCR7;SELL;SELPLG;S1PR1;S1PR4;CXCR4;ITGAL;ITGB2;KLF2	13040	9	6359	6	2.10231	0.23013	6	CXCR4;ITGAL;ITGB2;KLF2;S1PR1;S1PR4
	25	CD3	IFNG_Response_Core	13	STAT1;IRF1;IFI35;CXCL9;CXCL10;CXCL11;GBP1;GBP2;SOCS1;PSMB8;TAP1;TAP2;IDO1	13040	11	6359	7	1.83954	0.247173	7	GBP2;IDO1;IRF1;PSMB8;SOCS1;STAT1;TAP1
	28	CD3	Metabolic_Glycolysis_Shift	22	MYC;HK2;PFKFB3;PFKP;ALDOA;TPI1;GAPDH;PGK1;PGAM1;ENO1;PKM;LDHA;SLC2A1;SLC2A3;PDK1;AKT1;RHEB;MTOR;RPTOR;MLST8;RPS6KB1;EIF4EBP1	13040	20	6359	11	1.2846	0.368911	20	ALDOA;LDHA;MYC;PDK1;PFKFB3;PFKP;PKM;RHEB;SLC2A1;SLC2A3;TPI1;GAPDH;PGK1;PGAM1;ENO1;EIF4EBP1;RPS6KB1;MTOR;AKT1;MLST8
	26	CD3	DNA_Damage_NER_BER	33	XPA;XPC;ERCC1;ERCC2;ERCC3;ERCC4;ERCC5;DDB1;DDB2;RPA1;RPA2;RPA3;LIG1;PCNA;APEX1;OGG1;UNG;NEIL1;NEIL2;MPG;LIG3;PARP1;PARP2;XRCC1;POLB;ATM;ATR;GADD45A;GADD45B;GADD45G;DDIT3;DDIT4;TP53INP1	13040	31	6359	16	1.12098	0.444812	27	ATR;DDB1;DDIT3;DDIT4;GADD45A;GADD45B;LIG1;LIG3;NEIL1;NEIL2;OGG1;PARP1;PARP2;PCNA;POLB;RPA1;RPA2;RPA3;TP53INP1;XPA;XPC;ERCC1;ERCC2;ERCC3;ERCC4;ERCC5;DDB2
	37	CD3	Nucleotide_Turnover_RNA_Biogenesis	13	NT5C2;ITPK1;NTAN1;DGCR8;DROSHA;DICER1;PHAX;NCBP1;NCBP2;DDX5;DDX17;EXOSC10;XRN1	13040	13	6359	7	1.22599	0.46382	12	DDX17;DDX5;DROSHA;EXOSC10;NT5C2;NTAN1;PHAX;XRN1;DGCR8;DICER1;NCBP1;NCBP2
	24	CD3	TypeI_IFN_ISGylation_Core	33	ISG15;HERC5;UBA7;UBE2L6;USP18;STAT1;STAT2;IRF7;IFI6;IFI27;IFI44;IFI44L;IFIT1;IFIT2;IFIT3;IFIT5;MX1;MX2;OAS1;OAS2;OAS3;OASL;IFITM1;IFITM2;IFITM3;BST2;RSAD2;CMPK2;DDX58;IFIH1;PARP9;PARP14;XAF1	13040	32	6359	16	1.05076	0.514191	16	BST2;HERC5;IFIH1;IFIT3;IFITM3;MX2;OAS1;OAS2;PARP14;RSAD2;STAT1;STAT2;UBA7;UBE2L6;USP18;XAF1
	38	CD3	Tcell_Homeostatic_Signaling	8	IL7;IL7R;BCL2;MCL1;CCR7;KLF2;S1PR1;SELL	13040	8	6359	4	1.05067	0.609429	4	BCL2;KLF2;MCL1;S1PR1
	36	CD3	Vesicle_Trafficking_ER_Golgi_Autophagy	19	RETREG1;SEC13;SEC23A;SEC24A;SAR1A;COPA;COPB1;VPS26A;VPS29;VPS35;RAB5A;RAB7A;RAB11A;ATG5;ATG7;ATG12;BECN1;LAMP1;LAMP2	13040	19	6359	8	0.763802	0.790654	8	ATG7;COPA;LAMP1;RAB5A;RETREG1;SAR1A;VPS26A;VPS35
	34	CD3	Antigen_Processing_Presentation_MHC_I	13	TAP1;TAP2;PSMB8;PSMB9;B2M;ERAP1;ERAP2;HLA-A;HLA-B;HLA-C;HLA-E;HLA-F;HLA-G	13040	13	6359	5	0.656378	0.846338	5	ERAP2;HLA-F;PSMB8;PSMB9;TAP1
	3	CD68	Glucocorticoid_Pulse	25	NR3C1;HSD11B1;HSD11B2;TSC22D3;FKBP5;DUSP1;DUSP2;DUSP5;DUSP10;ZFP36;ZFP36L1;ZFP36L2;KLF9;KLF2;KLF4;KLF15;SGK1;PER1;PER2;DDIT4;NFKBIA;ANXA1;GADD45B;TSC22D1;ZBTB16	13040	23	3184	19	14.7858	6.921012e-09	19	ANXA1;DDIT4;DUSP1;DUSP10;DUSP2;DUSP5;FKBP5;GADD45B;HSD11B1;HSP90AB1;HSPA1B;HSPA8;HSPB1;HSPH1;KLF2;KLF9;NR3C1;PER1;TSC22D3
	4	CD68	IL10_STAT3_Program	22	IL10;IL10RA;IL10RB;STAT3;SOCS3;SOCS1;BCL3;TNFAIP3;ZC3H12A;SBNO2;CISH;IL1RN;ATF3;DUSP1;HMOX1;CD274;PDCD1LG2;MERTK;AXL;KLF4;IRF4;MAF	13040	21	3184	15	7.77059	7.356438e-06	15	ATF3;BCL3;CISH;DUSP1;IL10;IL10RA;KLF4;MAF;MERTK;PDCD1LG2;SBNO2;SOCS1;SOCS3;STAT3;TNFAIP3
	10	CD68	PGE2_Immunoreg	22	PTGS2;PTGS1;PTGES;PTGES2;PTGES3;PTGER2;PTGER4;PTGER1;PTGER3;HPGD;ADCY6;ADCY9;PRKACA;CREB1;PDE4B;PDE4D;EGR2;NFIL3;NR4A1;NR4A2;DUSP1;IL10	13040	20	3184	12	4.657	0.000737266	12	ADCY6;CREB1;DUSP1;EGR2;HPGD;IL10;NR4A1;NR4A2;PDE4B;PDE4D;PTGS2;PTGER4
	9	CD68	Lipid_Handling_Resolution	22	APOE;LPL;FABP5;FABP4;FABP3;PLIN2;PLIN3;PLIN5;SOAT1;DGAT1;DGAT2;LIPA;LDLR;SCARB1;NR1H3;NR1H2;PPARG;PPARD;SREBF1;SREBF2;SCD;ACACA	13040	22	3184	12	3.72484	0.00229603	12	ACACA;FABP3;FABP4;LDLR;LPL;NR1H2;NR1H3;PLIN2;PLIN3;PPARG;SCD;SREBF1
	12	CD68	NRF2_Antioxidant_Stress	24	NFE2L2;KEAP1;HMOX1;HMOX2;NQO1;GCLC;GCLM;SLC7A11;TXNRD1;TXN;PRDX1;PRDX2;PRDX6;SOD1;SOD2;CAT;GSR;GSS;GPX1;GPX4;SRXN1;MAFG;MAFK;SQSTM1	13040	22	3184	12	3.72484	0.00229603	12	GCLC;GPX1;GPX4;GSR;GSS;HMOX2;MAFK;PRDX1;PRDX2;SLC7A11;SRXN1;TXNRD1
	18	CD68	Damage_Stress_Response	25	HSP90AA1;HSP90AB1;HSPA1A;HSPA1B;HSPA8;HSPH1;HSPB1;DNAJB1;DNAJB4;FOS;FOSB;JUN;JUNB;ATF3;ATF2;ATF7;EGR1;EGR2;EGR3;DDIT3;DDIT4;GADD45A;GADD45B;GADD45G;TRIB3	13040	23	3184	11	2.84389	0.0123478	12	ATF3;DDIT4;DNAJB1;EGR1;EGR2;EGR3;FOS;GADD45A;GADD45B;HSP90AB1;HSPA1B;HSPA8
	2	CD68	Adenosine_CD39_CD73_A2	26	ENTPD1;NT5E;ENPP1;ENPP3;CD38;PANX1;SLC29A1;SLC29A2;ADA;ADK;AHCY;ADORA2A;ADORA2B;ADORA1;ADORA3;GNAS;ADCY6;ADCY9;PDE4B;PDE4D;PRKACA;CREB1;PPARG;IL10;P2RX7;P2RY2	13040	21	3184	9	2.32535	0.0488987	9	ADCY6;ADORA2A;AHCY;CREB1;GNAS;IL10;P2RX7;PDE4B;PDE4D
	0	CD68	Efferocytosis_LXR_PPAR	32	MERTK;AXL;TYRO3;GAS6;PROS1;MFGE8;TIMD4;ITGAV;ITGB3;ITGB5;DOCK1;ELMO1;RAC1;RAC2;LRP1;LDLR;SCARB1;CD36;PPARG;PPARD;NR1H3;NR1H2;RXRA;RXRB;ABCA1;ABCG1;ABCG4;APOE;APOC1;APOC2;APOC3;LIPA	13040	31	3184	12	1.95865	0.054794	12	APOC1;ELMO1;GAS6;ITGAV;LDLR;LRP1;MERTK;RAC1;SCARB1;TIMD4;TYRO3;ABCA1
	16	CD68	DAMP_Responders	30	IL1B;IL18;IL6;TNF;CXCL8;CXCL1;CXCL2;CXCL3;CCL2;CCL3;CCL4;CXCL9;CXCL10;CXCL11;IFNB1;IFNA1;IFNA2;ISG15;OAS1;OAS2;MX1;IFIT1;IFIT2;IFIT3;STAT1;IRF1;PTGS2;NOS2;SAA1;SAA2	13040	22	3184	9	2.14626	0.0653669	9	CCL2;CXCL1;IL18;IL1B;IL6;OAS1;OAS2;PTGS2;STAT1
	15	CD68	DAMP_Sensors	31	TLR1;TLR2;TLR3;TLR4;TLR5;TLR6;TLR7;TLR8;TLR9;AGER;P2RX7;P2RY2;P2RY6;MB21D1;TMEM173;DDX41;IFI16;ZBP1;NLRP3;NLRP1;NLRC4;AIM2;PYCARD;NOD1;NOD2;CLEC9A;CLEC7A;DDX58;IFIH1;FPR1;FPR2	13040	22	3184	9	2.14626	0.0653669	9	AGER;FPR1;IFIH1;NLRP3;P2RX7;TLR1;TLR2;TLR4;TLR6
	11	CD68	Control_Monocyte_Inflammatory	28	CCR2;CCR1;CCR5;SELL;S100A8;S100A9;S100A12;FCN1;VCAN;TREM1;TLR2;TLR4;IL1B;IL6;NLRP3;TNF;PLAUR;PLAU;CCL2;CCL3;CCL4;CXCL8;PTX3;NOD2;RIPK2;STAT1;NCF1;NCF2	13040	23	3184	9	1.99276	0.084934	9	CCL2;IL1B;IL6;NCF1;NLRP3;PLAUR;RIPK2;SELL;TNF
	17	CD68	TypeI_IFN_ISG_Positive	28	ISG15;IFI6;IFI27;IFI44;IFI44L;IFIT1;IFIT2;IFIT3;IFIT5;MX1;MX2;OAS1;OAS2;OAS3;OASL;IFITM1;IFITM2;IFITM3;BST2;RSAD2;CMPK2;DDX58;IFIH1;HERC5;USP18;XAF1;PARP9;PARP14	13040	27	3184	10	1.82346	0.0994756	10	BST2;IFIH1;IFITM3;MX2;OAS1;OAS2;PARP14;RSAD2;XAF1;ISG15
	1	CD68	Heme_CD163_HMOX1_Axis	28	CD163;HMOX1;HMOX2;BLVRB;BLVRA;HP;HPR;HPX;SLC48A1;SLC40A1;FTL;FTH1;CP;HFE;TFRC;TFR2;STEAP3;SLC11A2;SLC25A37;SLC25A28;FLVCR1;FLVCR2;ABCB6;FECH;ALAS1;NCOA4;LRP1;GLRX	13040	24	3184	9	1.85972	0.107619	9	ALAS1;BLVRA;BLVRB;FTH1;HFE;HMOX2;LRP1;SLC25A28;SLC40A1
	14	CD68	Autophagy_LAP_for_Clearance	29	MAP1LC3B;MAP1LC3A;GABARAP;GABARAPL1;GABARAPL2;ATG5;ATG7;ATG10;ATG12;ATG3;ATG16L1;ATG9A;ATG2A;ATG2B;ATG13;ATG14;ULK1;ULK2;RB1CC1;BECN1;WIPI1;WIPI2;RUBCN;RUBCNL;CYBB;NCF1;NCF2;NCF4;SQSTM1	13040	28	3184	10	1.72198	0.12234	10	ATG16L1;ATG2A;ATG2B;CYBB;GABARAPL1;GABARAPL2;MAP1LC3A;MAP1LC3B;NCF1;NCF2
	5	CD68	Scavenger_Clearance	25	MRC1;MSR1;MARCO;CD36;STAB1;STAB2;CLEC10A;VSIG4;CD68;ITGAM;ITGB2;ITGAX;SCARF1;SCARB1;OLR1;COLEC12;CD14;LRP1;CD44;CD163;C1QA;C1QB;C1QC;CR1;CFH	13040	25	3184	9	1.74331	0.133346	8	CD68;CR1;ITGAM;ITGB2;LRP1;MARCO;MRC1;OLR1
	6	CD68	LN_SCS_Macrophage_Identity	19	SIGLEC1;MSR1;C1QA;C1QB;C1QC;ICAM1;VCAM1;ITGAM;ITGB2;FCGR2B;FCGR3A;CD68;CSF1R;MAFB;MS4A7;MARCO;SCARF1;CD163;LRP1	13040	19	3184	7	1.80747	0.159193	7	CD68;FCGR3A;ICAM1;ITGAM;ITGB2;LRP1;MARCO
	7	CD68	PDL1_PD1L2_Checkpoints	19	CD274;PDCD1LG2;CD276;VTCN1;VSIR;LGALS9;HAVCR2;LILRB1;LILRB2;LILRB4;LAIR1;SIGLEC10;PVR;NECTIN2;TNFRSF14;SIRPA;CD47;IDO1;IDO2	13040	16	3184	6	1.85891	0.174428	6	CD276;LILRB4;NECTIN2;SIRPA;TNFRSF14;VSIR
	8	CD68	Phagolysosome_Maturation	26	LAMP1;LAMP2;CTSB;CTSL;CTSD;RAB5A;RAB7A;RAB34;ATP6V1A;ATP6V1B2;ATP6V1E1;ATP6V0D1;ATP6V0C;VPS33A;VPS39;VPS41;STX7;VAMP7;VAMP8;TFEB;MCOLN1;LGMN;LYST;CTSO;CTSZ;LIPA	13040	25	3184	8	1.45785	0.250563	8	ATP6V0C;CTSZ;LAMP1;LAMP2;MCOLN1;STX7;VAMP7;VAMP8
	13	CD68	cGAS_STING_Core	20	MB21D1;TMEM173;TBK1;IKBKE;IRF3;IRF7;DDX41;IFI16;TREX1;RNASEH2A;RNASEH2B;RNASEH2C;SAMHD1;POLR3A;POLR3C;ZBP1;SLC19A1;LRRC8A;ENPP1;TMEM203	13040	17	3184	3	0.662999	0.822818	3	IRF3;SLC19A1;ZBP1
	Column	Meaning
	CellType	The sample type used for ORA (CD68 = macrophage-focused, CD3 = T-cell focused).
	GeneSet	Name of the pathway or curated gene set tested.
	GeneCount	Total number of genes defined in that gene set (size of the set).
	Genes	Full list of genes belonging to the gene set, joined by semicolons.
	N	Total number of background genes in the universe (all genes tested).
	K	Number of genes in the gene set (GeneCount as it intersects with universe).
	n	Number of “foreground” genes (e.g., expressed or differentially expressed genes used in ORA).
	k	Overlap count = number of “foreground” genes that are also in the gene set.
	odds_ratio	Enrichment odds ratio from the ORA test (k/n vs K/N). Higher means stronger enrichment.
	pval	P-value from the ORA test for enrichment of the set.
	HitsCount	Number of overlapping genes actually observed (len(Hits)).
	Hits	Semicolon-separated list of the overlapping genes between the foreground and the gene set.
